# Supplementary material for: The Choice of PCR Primers Has Great Impact on Assessments of Bacterial Community Diversity and Dynamics in a Wastewater Treatment Plant
Source: PubMed Central journal article supplement (PMC3788133; doi:10.1371/journal.pone.0076431), 2013-10-01
Supplement: pone.0076431.s006.pdf [file pone.0076431.s006.pdf]

**Table S1. Number of 2 441 787 high quality sequences in the RDP database matching different primers.**

| <b>Number of mismatches allowed</b>         | <b>0</b> | <b>1</b> | <b>2</b> | <b>3</b> |
|---------------------------------------------|----------|----------|----------|----------|
| <b>27F&amp;1492R</b>                        | 35926    | 57086    | 75361    | 119395   |
| <b>27F&amp;1492R but not 63F&amp;M1387R</b> | 30051    | 36813    | 34059    | 14477    |
| <b>63F&amp;1387R</b>                        | 52363    | 152042   | 259616   | 450640   |
| <b>63F&amp;M1387R</b>                       | 52740    | 153122   | 263574   | 453724   |
| <b>63F&amp;M1387R but not 27F&amp;1492R</b> | 46865    | 132849   | 222272   | 348806   |
